# Supplementary material
Source: ML conference proceedings conference paper supplement (https://proceedings.mlr.press/v70/sakr17a.html)
Supplement: Supplementary file [file sakr17a-supp.pdf]

## Supplementary Material

The main purpose of this supplementary section is to provide proofs for Theorems 1 and 2.

### Preliminaries

Here we shall give a proof of (1) as well as preliminary results that will be needed to complete the proofs of Theorems 1 and 2.

**Proposition 1.** *The fixed point error probability  $p_{e,fx}$  is upper bounded as shown in (1).*

*Proof.* From the definitions of  $p_{e,fx}$ ,  $p_{e,fl}$ , and  $p_m$ ,

$$\begin{aligned} p_{e,fx} &= \Pr\{\hat{Y}_{fx} \neq Y\} \\ &= \Pr\{\hat{Y}_{fx} \neq Y, \hat{Y}_{fx} = \hat{Y}_{fl}\} + \Pr\{\hat{Y}_{fx} \neq Y, \hat{Y}_{fx} \neq \hat{Y}_{fl}\} \\ &= \Pr\{\hat{Y}_{fl} \neq Y, \hat{Y}_{fx} = \hat{Y}_{fl}\} + \Pr\{\hat{Y}_{fx} \neq Y, \hat{Y}_{fx} \neq \hat{Y}_{fl}\} \\ &\leq p_{e,fl} + p_m. \end{aligned}$$

□

Next is a simple result that allows us to replace the problem of upper bounding  $p_m$  by several smaller and easier problems by virtue of the union bound.

**Proposition 2.** *In a  $M$ -class classification problem, the total mismatch probability can be upper bounded as follows:*

$$p_m \leq \sum_{j=1}^M \sum_{i=1, i \neq j}^M \Pr(\hat{Y}_{fx} = i | \hat{Y}_{fl} = j) \Pr(\hat{Y}_{fl} = j) \quad (15)$$

*Proof.*

$$\begin{aligned} p_m &= \Pr(\hat{Y}_{fx} \neq \hat{Y}_{fl}) = \Pr\left(\bigcup_{j=1}^M (\hat{Y}_{fx} \neq j, \hat{Y}_{fl} = j)\right) \\ &\leq \sum_{j=1}^M \Pr(\hat{Y}_{fx} \neq j, \hat{Y}_{fl} = j) \\ &= \sum_{j=1}^M \Pr(\hat{Y}_{fx} \neq j | \hat{Y}_{fl} = j) \Pr(\hat{Y}_{fl} = j) \\ &= \sum_{j=1}^M \Pr\left(\bigcup_{i=1, i \neq j}^M \hat{Y}_{fx} = i \mid \hat{Y}_{fl} = j\right) \Pr(\hat{Y}_{fl} = j) \\ &\leq \sum_{j=1}^M \sum_{i=1, i \neq j}^M \Pr(\hat{Y}_{fx} = i | \hat{Y}_{fl} = j) \Pr(\hat{Y}_{fl} = j) \end{aligned}$$

where both inequalities are due to the union bound. □

The next result is also straightforward, but quite useful in obtaining upper bounds that are fully determined by averages.

**Proposition 3.** *Given a random variable  $X$  and an event  $\mathcal{E}$ , we have:*

$$\mathbb{E}[X \cdot \mathbb{1}_{\mathcal{E}}] = \mathbb{E}[X | \mathcal{E}] \Pr(\mathcal{E}) \quad (16)$$

where  $\mathbb{1}_{\mathcal{E}}$  denotes the indicator function of the event  $\mathcal{E}$ .

*Proof.* By the law of total expectation,

$$\begin{aligned} \mathbb{E}[X \cdot \mathbb{1}_{\mathcal{E}}] &= \mathbb{E}[X \cdot \mathbb{1}_{\mathcal{E}} | \mathcal{E}] \Pr(\mathcal{E}) + \mathbb{E}[X \cdot \mathbb{1}_{\mathcal{E}} | \mathcal{E}^c] \Pr(\mathcal{E}^c) \\ &= \mathbb{E}[X \cdot 1 | \mathcal{E}] \Pr(\mathcal{E}) + \mathbb{E}[X \cdot 0 | \mathcal{E}^c] \Pr(\mathcal{E}^c) \\ &= \mathbb{E}[X | \mathcal{E}] \Pr(\mathcal{E}). \end{aligned}$$

□

### Proof of Theorem 1

Let us define  $p_{m,j \rightarrow i}$  for  $i \neq j$  as follows.

$$p_{m,j \rightarrow i} = \Pr\{\hat{Y}_{fx} = i \mid \hat{Y}_{fl} = j\} \quad (17)$$

We first prove the following Lemma.

**Lemma 1.** *Given  $B_X$  and  $B_F$ , if the output of the floating-point network is  $\hat{Y}_{fl} = j$ , then that of the fixed-point network would be  $\hat{Y}_{fx} = i$  with a probability upper bounded as follows:*

$$\begin{aligned} p_{m,j \rightarrow i} &\leq \frac{\Delta_A^2}{24} \mathbb{E}\left[\frac{\sum_{h \in \mathcal{A}} \left|\frac{\partial(Z_i - Z_j)}{\partial A_h}\right|^2}{|Z_i - Z_j|^2} \mid \hat{Y}_{fl} = j\right] \\ &\quad + \frac{\Delta_W^2}{24} \mathbb{E}\left[\frac{\sum_{h \in \mathcal{W}} \left|\frac{\partial(Z_i - Z_j)}{\partial w_h}\right|^2}{|Z_i - Z_j|^2} \mid \hat{Y}_{fl} = j\right]. \end{aligned} \quad (18)$$

*Proof.* We can claim that, if  $i \neq j$ :

$$p_{m,j \rightarrow i} \leq \Pr\{Z_i + q_{Z_i} > Z_j + q_{Z_j} \mid \hat{Y}_{fl} = j\} \quad (19)$$

where the equality holds for  $M = 2$ .

From the law of total probability,

$$p_{m,j \rightarrow i} \leq \int f_{\mathbf{X}}(\mathbf{x}) \Pr \left( z_i + q_{z_i} > z_j + q_{z_j} \mid \hat{Y}_{fl} = j, \mathbf{x} \right) d\mathbf{x}, \quad (20)$$

where  $\mathbf{x}$  denotes the input of the network, or equivalently an element from the dataset and  $f_{\mathbf{X}}(\cdot)$  is the distribution of the input data. But for one specific  $\mathbf{x}$  given  $\hat{Y}_{fl} = j$ , we have:

$$\Pr (z_i + q_{z_i} > z_j + q_{z_j}) = \frac{1}{2} \Pr (|q_{z_i} - q_{z_j}| > |z_j - z_i|)$$

where the  $\frac{1}{2}$  term is due to the symmetry of the distribution of the quantization noise around zero per output. By (7), we can claim that

$$q_{z_i} - q_{z_j} = \sum_{h \in \mathcal{A}} q_{a_h} \frac{\partial(z_i - z_j)}{\partial a_h} + \sum_{h \in \mathcal{W}} q_{w_h} \frac{\partial(z_i - z_j)}{\partial w_h}. \quad (21)$$

Note that  $q_{z_i} - q_{z_j}$  is a zero mean random variable with the following variance

$$\frac{\Delta_A^2}{12} \sum_{h \in \mathcal{A}} \left| \frac{\partial(z_i - z_j)}{\partial a_h} \right|^2 + \frac{\Delta_W^2}{12} \sum_{h \in \mathcal{W}} \left| \frac{\partial(z_i - z_j)}{\partial w_h} \right|^2.$$

By Chebyshev's inequality, we obtain

$$\begin{aligned} & \Pr (z_i + q_{z_i} > z_j + q_{z_j}) \\ & \leq \frac{\Delta_A^2 \sum_{h \in \mathcal{A}} \left| \frac{\partial(z_i - z_j)}{\partial a_h} \right|^2 + \Delta_W^2 \sum_{h \in \mathcal{W}} \left| \frac{\partial(z_i - z_j)}{\partial w_h} \right|^2}{24 |z_i - z_j|^2}. \end{aligned} \quad (22)$$

From (20) and (22), we can derive (18).  $\square$

Plugging (18) of Lemma 1 into (15) and using (16),

$$\begin{aligned} p_m & \leq \sum_{j=1}^M \sum_{i=1, i \neq j}^M \left( \frac{\Delta_A^2}{24} \mathbb{E} \left[ \frac{\sum_{h \in \mathcal{A}} \left| \frac{\partial(Z_i - Z_j)}{\partial A_h} \right|^2}{|Z_i - Z_j|^2} \mathbb{1}_{\hat{Y}_{fl}=j} \right] \right. \\ & \quad \left. + \frac{\Delta_W^2}{24} \mathbb{E} \left[ \frac{\sum_{h \in \mathcal{W}} \left| \frac{\partial(Z_i - Z_j)}{\partial w_h} \right|^2}{|Z_i - Z_j|^2} \mathbb{1}_{\hat{Y}_{fl}=j} \right] \right) \end{aligned} \quad (23)$$

which can be simplified into (8) in Theorem 1.

## Proof of Theorem 2

We start with the following lemma.

**Lemma 2.** Given  $B_A$  and  $B_W$ ,  $p_{m,j \rightarrow i}$  is upper bounded as follows:

$$p_{m,j \rightarrow i} \leq \mathbb{E} \left[ e^{-T \cdot V} \prod_{h \in \mathcal{A}} \frac{\sinh(T \cdot D_{A,h})}{T \cdot D_{A,h}} \prod_{h \in \mathcal{W}} \frac{\sinh(T \cdot D_{W,h})}{T \cdot D_{W,h}} \Big| \hat{Y}_{fl} = j \right] \quad (24)$$

where  $T = \frac{3V}{\sum_{h \in \mathcal{A}} \Delta_{A,h}^2 + \sum_{h \in \mathcal{W}} \Delta_{W,h}^2}$ ,  $V = Z_j - Z_i$ ,  $D_{A,h} = \frac{\Delta_A}{2} \cdot \frac{\partial(Z_i - Z_j)}{\partial A_h}$ , and  $D_{W,h} = \frac{\Delta_W}{2} \cdot \frac{\partial(Z_i - Z_j)}{\partial W_h}$ .

*Proof.* The setup is similar to that of Lemma 1. Denote  $v = z_j - z_i$ . By the Chernoff bound,

$$\Pr (q_{z_i} - q_{z_j} > v) \leq e^{-tv} \mathbb{E} \left[ e^{t(q_{z_i} - q_{z_j})} \right]$$

for any  $t > 0$ . Because quantizations noise terms are independent, by (21),

$$\mathbb{E} \left[ e^{t(q_{z_i} - q_{z_j})} \right] = \prod_{h \in \mathcal{A}} \mathbb{E} \left[ e^{tq_{a_h} d'_{a_h}} \right] \prod_{h \in \mathcal{W}} \mathbb{E} \left[ e^{tq_{w_h} d'_{w_h}} \right]$$

where  $d'_{a_h} = \frac{\partial(z_i - z_j)}{\partial a_h}$  and  $d'_{w_h} = \frac{\partial(z_i - z_j)}{\partial w_h}$ . Also,  $\mathbb{E} \left[ e^{tq_{a_h} d'_{a_h}} \right]$  is given by

$$\begin{aligned} \mathbb{E} \left[ e^{tq_{a_h} d'_{a_h}} \right] & = \frac{1}{\Delta_A} \int_{-\frac{\Delta_A}{2}}^{\frac{\Delta_A}{2}} e^{tq_{a_h} d'_{a_h}} dq_{a_h} \\ & = \frac{2}{td'_{a_h} \Delta_A} \sinh \left( \frac{td'_{a_h} \Delta_A}{2} \right) \\ & = \frac{\sinh(td_{a_h})}{td_{a_h}} \end{aligned}$$

where  $d_{a_h} = \frac{d'_{a_h} \Delta_A}{2}$ . Similarly,  $\mathbb{E} \left[ e^{tq_{w_h} d'_{w_h}} \right] = \frac{\sinh(td_{w_h})}{td_{w_h}}$  where  $d_{w_h} = \frac{d'_{w_h} \Delta_W}{2}$ .

Hence,

$$\begin{aligned} & \Pr (q_{z_i} - q_{z_j} > v) \\ & \leq e^{-tv} \prod_{h \in \mathcal{A}} \frac{\sinh(td_{a,h})}{td_{a,h}} \prod_{h \in \mathcal{W}} \frac{\sinh(td_{w,h})}{td_{w,h}}. \end{aligned} \quad (25)$$

By taking logarithms, the right-hand-side is given by

$$\begin{aligned} & -tv + \sum_{h \in \mathcal{A}} (\ln \sinh(td_{a,h}) - \ln(td_{a,h})) \\ & \quad + \sum_{h \in \mathcal{W}} (\ln \sinh(td_{w,h}) - \ln(td_{w,h})). \end{aligned}$$

This term corresponds to a linear function of  $t$  added to a sum of log-moment generating functions. It is hence convex in  $t$ . By taking derivative with respect to  $t$  and setting to zero,

$$v + \frac{|\mathcal{A}| + |\mathcal{W}|}{t} = \sum_{h \in \mathcal{A}} \frac{d_{a,h}}{\tanh(td_{a,h})} + \sum_{h \in \mathcal{W}} \frac{d_{w,h}}{\tanh(td_{w,h})}.$$

But  $\tanh(x) = x - \frac{1}{3}x^3 + \mathbf{o}(x^5)$ , so dropping fifth order terms yields:

$$v + \frac{|\mathcal{A}| + |\mathcal{W}|}{t} = \sum_{h \in \mathcal{A}} \frac{1}{t(1 - \frac{(td_{a,h})^2}{3})} + \sum_{h \in \mathcal{W}} \frac{1}{t(1 - \frac{(td_{w,h})^2}{3})}.$$

Note, for the terms inside the summations, we divided numerator and denominator by  $d_{a,h}$  and  $d_{w,h}$ , respectively, then factored the denominator by  $t$ . Now, we multiply both sides by  $t$  to get:

$$tv + |\mathcal{A}| + |\mathcal{W}| = \sum_{h \in \mathcal{A}} \frac{1}{1 - \frac{(td_{a,h})^2}{3}} + \sum_{h \in \mathcal{W}} \frac{1}{1 - \frac{(td_{w,h})^2}{3}}.$$

Also  $\frac{1}{1-x^2} = 1 + x^2 + \mathbf{o}(x^4)$ , so we drop fourth order terms:

$$\begin{aligned} tv + |\mathcal{A}| + |\mathcal{W}| &= \sum_{h \in \mathcal{A}} \left(1 + \frac{(td_{a,h})^2}{3}\right) + \sum_{h \in \mathcal{W}} \left(1 + \frac{(td_{w,h})^2}{3}\right) \end{aligned}$$

which yields:

$$t = \frac{3v}{\sum_{h \in \mathcal{A}} (d_{a,h})^2 + \sum_{h \in \mathcal{W}} (d_{w,h})^2} \quad (26)$$

By plugging (25) into (26) and using the similar method of Lemma 1, we can derive (24) of Lemma 2.  $\square$

Theorem 2 is obtained by plugging (24) of Lemma 2 into (15) and using (16). Of course,  $D_{A_h}^{(i,j)}$  is the random variable of  $d_{a,h}$  when  $\hat{y}_{fx} = i$  and  $\hat{y}_{fl} = j$ , and the same applies to  $D_{w_h}^{(i,j)}$  and  $d_{w,h}$ . We dropped the superscript  $(i, j)$  in the Lemma as it was not needed for the consistency of the definitions.
